# Supplementary material
Source: Springer Nature journal article supplement (https://www.springerprofessional.de/resource/supplementary/13638_2011_303_MOESM7_ESM.pdf/11898162)

Execution Part

Interface Part

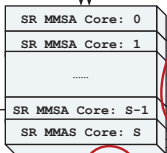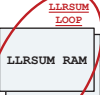

LLRSUM  
LOOP

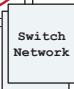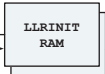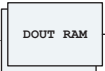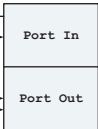

cfg  
din  
dout

LLREX  
LOOP

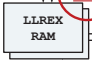

00..0

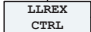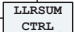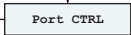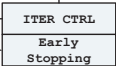

Control Part

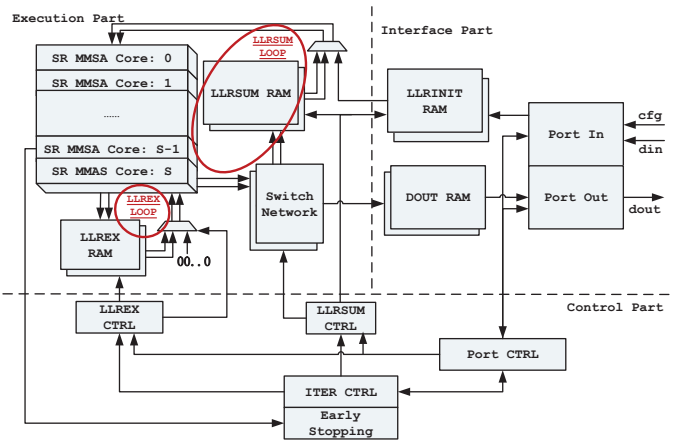

Supplement: MOESM7 [file 11898162]
